# Supplementary material for: Nontoxigenic Vibrio cholerae Challenge Strains for Evaluating Vaccine Efficacy and Inferring Mechanisms of Protection
Source: PubMed Central journal article supplement (PMC9040834; doi:10.1128/mbio.00539-22), 2022-04-07

Figure S1

a

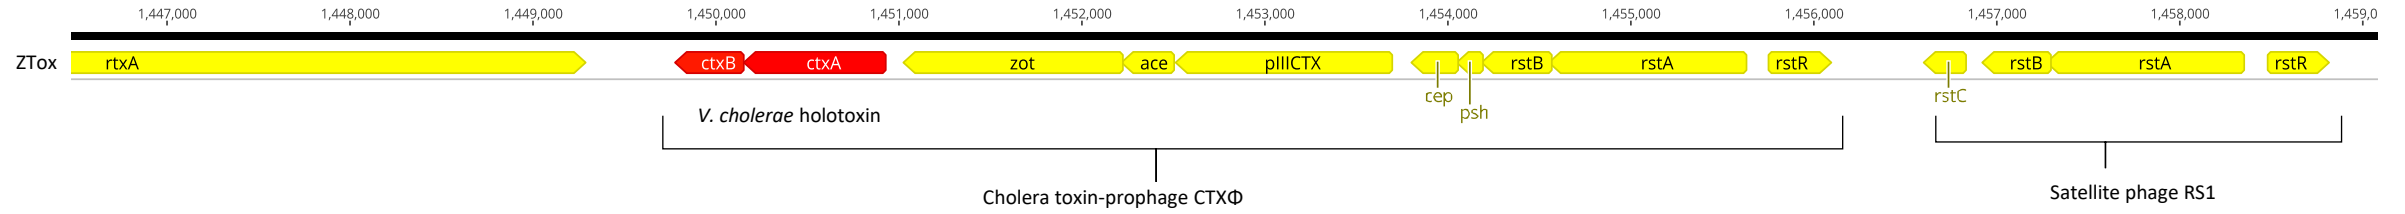

b

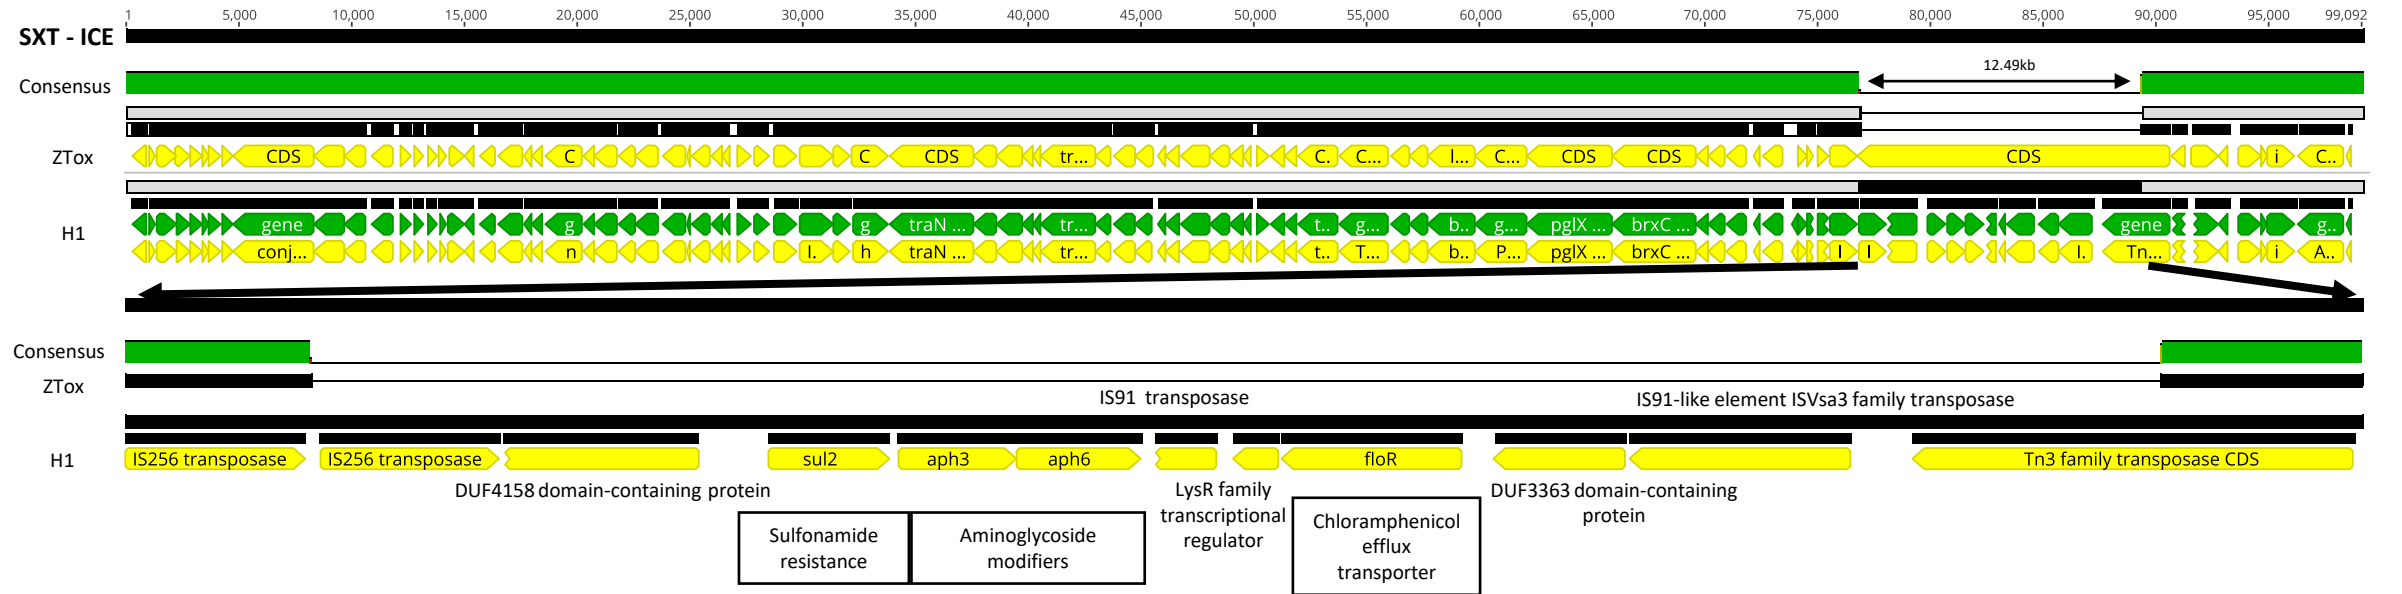

Supplement: mbio.00539-22-sf001.pdf [file mbio.00539-22-sf001.pdf]
