# Supplementary material for: Nontoxigenic Vibrio cholerae Challenge Strains for Evaluating Vaccine Efficacy and Inferring Mechanisms of Protection
Source: PubMed Central journal article supplement (PMC9040834; doi:10.1128/mbio.00539-22), 2022-04-07
Supplement: mbio.00539-22-st001.pdf [file mbio.00539-22-st001.pdf]

| Antibiotic                    | zChol <sup>0</sup> |                | zChol <sup>1</sup> |                |
|-------------------------------|--------------------|----------------|--------------------|----------------|
|                               | MIC (µg/mL)        | Interpretation | MIC (µg/mL)        | Interpretation |
| Ampicillin                    | 4                  | S              | 4                  | S              |
| Azithromycin                  | 0.5                | S              | 0.5                | S              |
| Ciprofloxacin                 | 0.5                | S              | 0.5                | S              |
| Erythromycin                  | 2                  | N              | 2                  | N              |
| Tetracycline                  | 1                  | S              | 1                  | S              |
| Sulfamethoxazole/Trimethoprim | 0.25               | S              | 0.25               | S              |
| Streptomycin                  | >200               | R              | >200               | R              |

Supp Table 1
