# Supplementary material for: Nontoxigenic Vibrio cholerae Challenge Strains for Evaluating Vaccine Efficacy and Inferring Mechanisms of Protection
Source: PubMed Central journal article supplement (PMC9040834; doi:10.1128/mbio.00539-22), 2022-04-07
Supplement: mbio.00539-22-st002.pdf [file mbio.00539-22-st002.pdf]

## ZTox.fasta

| <b>Name</b> | <b>Description</b>                                                 | <b>Contig</b> | <b>Location</b> |
|-------------|--------------------------------------------------------------------|---------------|-----------------|
| VC0817      | Putative transposae vpiT                                           | 1             | Chromosome I    |
| VC0818      | Uncharacterized protein                                            | 1             | Chromosome I    |
| VC0819      | Aldehyde dehydrogenase aldA                                        | 1             | Chromosome I    |
| VC0820      | ToxR-activated gene A lipoprotein tagA                             | 1             | Chromosome I    |
| VC0821      | Uncharacterized protein                                            | 1             | Chromosome I    |
| VC0823      | Uncharacterized protein                                            | 1             | Chromosome I    |
| VC0824      | Thiol peroxidase tpx                                               | 1             | Chromosome I    |
| VC0825      | Toxin coregulated pilus biosynthesis protein I tcpI                | 1             | Chromosome I    |
| VC0826      | Toxin coregulated pilus biosynthesis protein P tcpP                | 1             | Chromosome I    |
| VC0827      | Toxin coregulated pilus biosynthesis protein H tcpH                | 1             | Chromosome I    |
| VC0828      | Toxin coregulated pilin tcpA                                       | 1             | Chromosome I    |
| VC0829      | Toxin coregulated pilus biosynthesis protein B tcpB                | 1             | Chromosome I    |
| VC0830      | Toxin coregulated pilus biosynthesis protein Q tcpQ                | 1             | Chromosome I    |
| VC0831      | Toxin coregulated pilus biosynthesis outer membrane protein C tcpC | 1             | Chromosome I    |
| VC0832      | Toxin coregulated pilus biosynthesis protein R tcpR                | 1             | Chromosome I    |
| VC0833      | Toxin coregulated pilus biosynthesis protein D tcpD                | 1             | Chromosome I    |
| VC0834      | Toxin coregulated pilus biosynthesis protein S tcpS                | 1             | Chromosome I    |
| VC0835      | Toxin coregulated pilus biosynthesis protein T tcpT                | 1             | Chromosome I    |
| VC0836      | Toxin coregulated pilus biosynthesis protein E tcpE                | 1             | Chromosome I    |
| VC0837      | Toxin coregulated pilus biosynthesis protein F tcpF                | 1             | Chromosome I    |
| VC0838      | TCP pilus virulence regulatory protein toxT tcpN                   | 1             | Chromosome I    |
| VC0839      | Prepilin leader peptidase/N-methyltransferase tcpJ                 | 1             | Chromosome I    |
| VC0840      | Accessory colonization factor AcfB acfB                            | 1             | Chromosome I    |
| VC0841      | Accessory colonization factor AcfC acfC                            | 1             | Chromosome I    |
| VC0842      | RDD domain-containing protein                                      | 1             | Chromosome I    |
| VC0843      | TagE protein tagE                                                  | 1             | Chromosome I    |
| VC0844      | Accessory colonization factor AcfA acfA                            | 1             | Chromosome I    |
| VC0845      | Accessory colonization factor AcfD acfD                            | 1             | Chromosome I    |
| VC0847      | Integrase intV                                                     | 1             | Chromosome I    |

Supp Table 2

| <b>Identity</b> | <b>Start</b> | <b>End</b> |
|-----------------|--------------|------------|
| 100             | 2213339      | 2212362    |
| 100             | 2211656      | 2212336    |
| 100             | 2209794      | 2211314    |
| 100             | 2209614      | 2206573    |
| 99.9            | 2206460      | 2204763    |
| 100             | 2201862      | 2200924    |
| 100             | 2200814      | 2200320    |
| 100             | 2198182      | 2200044    |
| 100             | 2197740      | 2197075    |
| 100             | 2197090      | 2196680    |
| 99.9            | 2196136      | 2195462    |
| 100             | 2195382      | 2194090    |
| 100             | 2194090      | 2193638    |
| 100             | 2193635      | 2192166    |
| 100             | 2192173      | 2191718    |
| 100             | 2191730      | 2190894    |
| 100             | 2190878      | 2190420    |
| 100             | 2190430      | 2188919    |
| 100             | 2188944      | 2187922    |
| 100             | 2187912      | 2186896    |
| 100             | 2186689      | 2185859    |
| 100             | 2185859      | 2185098    |
| 100             | 2185091      | 2183211    |
| 99.7            | 2183205      | 2182436    |
| 100             | 2182420      | 2181947    |
| 100             | 2181938      | 2181030    |
| 100             | 2180380      | 2181027    |
| 100             | 2180206      | 2175644    |
| 100             | 2172460      | 2173728    |

## ZTox.fasta

| <b>Name</b> | <b>Description</b>                                        | <b>Contig</b> | <b>Location</b> |
|-------------|-----------------------------------------------------------|---------------|-----------------|
| VC1758      | Prophage integrase IntA                                   | 1             | Chromosome I    |
| VC1759      | Uncharacterized protein                                   | 1             | Chromosome I    |
| VC1759      | Uncharacterized protein                                   | 1             | Chromosome I    |
| VC1760      | Putative helicase                                         | 1             | Chromosome I    |
| VC1761      | VC1761                                                    | 1             | Chromosome I    |
| VC1762      | EH Signature domain-containing protein                    | 1             | Chromosome I    |
| VC1763      | Chemotaxis protein MotB-related protein                   | 1             | Chromosome I    |
| VC1764      | Uncharacterized protein                                   | 1             | Chromosome I    |
| VC1765      | Type I site-specific deoxyribonuclease                    | 1             | Chromosome I    |
| VC1766      | Uncharacterized protein                                   | 1             | Chromosome I    |
| VC1767      | DUF262 domain-containing protein                          | 1             | Chromosome I    |
| VC1768      | Methylase S domain-containing protein                     | 1             | Chromosome I    |
| VC1769      | Site-specific DNA-methyltransferase                       | 1             | Chromosome I    |
| VC1770      | Uncharacterized protein                                   | 1             | Chromosome I    |
| VC1771      | Uncharacterized protein                                   | 1             | Chromosome I    |
| VC1772      | WYL domain-containing protein                             | 1             | Chromosome I    |
| VC1773      | Kelch domain-containing protein                           | 1             | Chromosome I    |
| VC1774      | N-acetylneuraminate epimerase nanM                        | 1             | Chromosome I    |
| VC1775      | Uncharacterized protein                                   | 1             | Chromosome I    |
| VC1776      | Putative N-acetylneuraminate lyase                        | 1             | Chromosome I    |
| VC1777      | Sialic acid TRAP transporter large permease protein SiaM  | 1             | Chromosome I    |
| VC1778      | Sialic acid TRAP transporter small permease protein SiaQ  | 1             | Chromosome I    |
| VC1779      | Sialic acid-binding periplasmic protein SiaP              | 1             | Chromosome I    |
| VC1781      | Putative N-acetylmannosamine-6-phosphate 2-epimerase nanE | 1             | Chromosome I    |
| VC1782      | N-acetylmannosamine kinase nanK                           | 1             | Chromosome I    |
| VC1783      | N-acetylglucosamine-6-phosphate deacetylase               | 1             | Chromosome I    |
| VC1784      | Sialidase nanH                                            | 1             | Chromosome I    |
| VC1785      | Transcriptional regulator                                 | 1             | Chromosome I    |
| VC1786      | UPF0758 protein                                           | 1             | Chromosome I    |
| VC1787      | Uncharacterized protein                                   | 1             | Chromosome I    |
| VC1788      | Uncharacterized protein                                   | 1             | Chromosome I    |
| VC1788      | Uncharacterized protein                                   | 1             | Chromosome I    |
| VC1788      | Uncharacterized protein                                   | 2             | Chromosome II   |
| VC1789      | Transposase OrfAB, subunit B                              | 1             | Chromosome I    |
| VC1789      | Transposase OrfAB, subunit B                              | 1             | Chromosome I    |
| VC1789      | Transposase OrfAB, subunit B                              | 1             | Chromosome I    |
| VC1789      | Transposase OrfAB, subunit B                              | 1             | Chromosome I    |
| VC1789      | Transposase OrfAB, subunit B                              | 2             | Chromosome II   |
| VC1789      | Transposase OrfAB, subunit B                              | 2             | Chromosome II   |
| VC1789      | Transposase OrfAB, subunit B                              | 2             | Chromosome II   |
| VC1791      | Uncharacterized protein                                   | 1             | Chromosome I    |
| VC1791      | Uncharacterized protein                                   | 1             | Chromosome I    |
| VC1792      | Uncharacterized protein                                   | 1             | Chromosome I    |
| VC1792      | Uncharacterized protein                                   | 1             | Chromosome I    |
| VC1793      | Uncharacterized protein                                   | 1             | Chromosome I    |

|        |                                               |                |
|--------|-----------------------------------------------|----------------|
| VC1793 | Uncharacterized protein                       | 1 Chromosome I |
| VC1794 | Uncharacterized protein                       | 1 Chromosome I |
| VC1794 | Uncharacterized protein                       | 1 Chromosome I |
| VC1795 | Putative transcriptional regulator            | 1 Chromosome I |
| VC1795 | Putative transcriptional regulator            | 1 Chromosome I |
| VC1796 | Middle operon regulator-related protein       | 1 Chromosome I |
| VC1796 | Middle operon regulator-related protein       | 1 Chromosome I |
| VC1797 | Uncharacterized protein                       | 1 Chromosome I |
| VC1797 | Uncharacterized protein                       | 1 Chromosome I |
| VC1798 | Eha protein                                   | 1 Chromosome I |
| VC1798 | Eha protein                                   | 1 Chromosome I |
| VC1799 | Integrase catalytic domain-containing protein | 1 Chromosome I |
| VC1799 | Integrase catalytic domain-containing protein | 1 Chromosome I |
| VC1800 | Uncharacterized protein                       | 1 Chromosome I |
| VC1800 | Uncharacterized protein                       | 1 Chromosome I |
| VC1801 | Uncharacterized protein                       | 1 Chromosome I |
| VC1801 | Uncharacterized protein                       | 1 Chromosome I |
| VC1802 | Uncharacterized protein                       | 1 Chromosome I |
| VC1802 | Uncharacterized protein                       | 1 Chromosome I |
| VC1804 | Uncharacterized protein                       | 1 Chromosome I |
| VC1805 | Uncharacterized protein                       | 1 Chromosome I |
| VC1806 | G domain-containing protein                   | 1 Chromosome I |
| VC1807 | VC1807                                        | 1 Chromosome I |
| VC1808 | Uncharacterized protein                       | 1 Chromosome I |
| VC1809 | Putative transcriptional regulator            | 1 Chromosome I |

| <b>Identity</b> | <b>Start</b> | <b>End</b> |
|-----------------|--------------|------------|
| 100             | 1778425      | 1779660    |
| 100             | 1779756      | 1780211    |
| 89.3            | 2173279      | 2173689    |
| 100             | 1783140      | 1780342    |
| 100             | 1783791      | 1783187    |
| 100             | 1785233      | 1783782    |
| 100             | 1785964      | 1785230    |
| 100             | 1788077      | 1785957    |
| 100             | 1791181      | 1788122    |
| 100             | 1793209      | 1791218    |
| 100             | 1794614      | 1793202    |
| 100             | 1795943      | 1794615    |
| 100             | 1798341      | 1795960    |
| 100             | 1800545      | 1798482    |
| 100             | 1804144      | 1800527    |
| 100             | 1804217      | 1805077    |
| 100             | 1806212      | 1805142    |
| 100             | 1807381      | 1806227    |
| 100             | 1808399      | 1807563    |
| 100             | 1809424      | 1808528    |
| 100             | 1810745      | 1809462    |
| 100             | 1811262      | 1810753    |
| 100             | 1812290      | 1811325    |
| 100             | 1812517      | 1813227    |
| 100             | 1813215      | 1814078    |
| 100             | 1814082      | 1815218    |
| 100             | 1815642      | 1817987    |
| 100             | 1818310      | 1818134    |
| 100             | 1818454      | 1818930    |
| 100             | 1818927      | 1819064    |
| 100             | 1140446      | 1141141    |
| 100             | 1819855      | 1819160    |
| 100             | 2015         | 1320       |
| 99.8            | 1139272      | 1140449    |
| 99.8            | 1463891      | 1465065    |
| 99.8            | 1821029      | 1819852    |
| 99.8            | 2629815      | 2630992    |
| 99.8            | 3189         | 2012       |
| 99.8            | 357251       | 356074     |
| 99.8            | 55756        | 56933      |
| 100             | 1138270      | 1139229    |
| 100             | 1822031      | 1821072    |
| 100             | 1137695      | 1138054    |
| 100             | 1822606      | 1822247    |
| 100             | 1137275      | 1137646    |

|     |         |         |
|-----|---------|---------|
| 100 | 1823026 | 1822655 |
| 100 | 1136636 | 1137214 |
| 100 | 1823665 | 1823087 |
| 100 | 1136297 | 1136617 |
| 100 | 1824004 | 1823684 |
| 100 | 1135936 | 1136310 |
| 100 | 1824365 | 1823991 |
| 100 | 1134665 | 1135126 |
| 100 | 1825636 | 1825175 |
| 100 | 1133553 | 1134662 |
| 100 | 1826748 | 1825639 |
| 100 | 1131824 | 1133581 |
| 100 | 1828477 | 1826720 |
| 100 | 1130846 | 1131817 |
| 100 | 1829455 | 1828484 |
| 100 | 1130172 | 1130507 |
| 100 | 1830129 | 1829794 |
| 100 | 1129946 | 1130182 |
| 100 | 1830355 | 1830119 |
| 100 | 1129117 | 1128854 |
| 100 | 1128803 | 1128357 |
| 100 | 1128250 | 1127264 |
| 100 | 1126589 | 1127229 |
| 100 | 1126297 | 1125452 |
| 100 | 1125137 | 1125337 |

## ZTox.fasta

| <b>Name</b> | <b>Description</b>                        | <b>Contig</b> | <b>Location</b> | <b>Identity</b> | <b>Start</b> |
|-------------|-------------------------------------------|---------------|-----------------|-----------------|--------------|
| VC0174      | SPOR domain-containing protein            |               | 1 Chromosome I  | 100             | 2995980      |
| VC0175      | Deoxycytidylate deaminase-related protein |               | 1 Chromosome I  | 100             | 2993191      |
| VC0176      | Putative transcriptional regulator vspR   |               | 1 Chromosome I  | 100             | 2992365      |
| VC0177      | transcriptional regulator vspR            |               | 1 Chromosome I  | 100             | 2992262      |
| VC0178      | Patatin-related protein capV              |               | 1 Chromosome I  | 100             | 2990785      |
| VC0179      | Cyclic GMP-AMP synthase dncV              |               | 1 Chromosome I  | 100             | 2989698      |
| VC0180      | ThiF domain-containing protein            |               | 1 Chromosome I  | 99.9            | 2988391      |
| VC0181      | Prok-JAB domain-containing protein        |               | 1 Chromosome I  | 100             | 2986644      |
| VC0182      | Uncharacterized                           |               | 1 Chromosome I  | 100             | 2985735      |
| VC0183      | Phage integrase int                       |               | 1 Chromosome I  | 100             | 2983652      |
| VC0184      | Uncharacterized                           |               | 1 Chromosome I  | 100             | 2981954      |
| VC0185      | Putative transposase                      |               | 1 Chromosome I  | 100             | 2980755      |
| VC0186      | Glutathione reductase gorA                |               | 1 Chromosome I  | 100             | 2979314      |
| VC RS0086   | Uncharacterized                           |               | 1 Chromosome I  | 100             | 2992882      |
| VC RS0087   | Uncharacterized                           |               | 1 Chromosome I  | 100             | 2991282      |

**End**

2995033

2994780

2992673

2991699

2989718

2988394

2986637

2986177

2986166

2985763

2983642

2981957

2980666

2993115

2991034



## ZTox.fasta

| Name    | Description                           | Contig | Location      | Identity | Start   | End     |
|---------|---------------------------------------|--------|---------------|----------|---------|---------|
| VC0489  | Putative hemolysin                    | 1      | Chromosome I  | 100      | 2637735 | 2639495 |
| VC0490  | Uncharacterized protein               | 1      | Chromosome I  | 100      | 2635012 | 2636973 |
| VC0491  | Uncharacterized protein               | 1      | Chromosome I  | 100      | 2634475 | 2635011 |
| VC0492  | Uncharacterized protein               | 1      | Chromosome I  | 100      | 2633340 | 2634506 |
| VC0493  | Uncharacterized protein               | 1      | Chromosome I  | 100      | 2632209 | 2633084 |
| VC0494  | Uncharacterized protein               | 1      | Chromosome I  | 100      | 2631824 | 2631180 |
| VC0500a | TransposaseOrfAB,subunit a            | 1      | Chromosome I  | 82.5     | 1139447 | 1139583 |
| VC0500a | TransposaseOrfAB,subunit a            | 1      | Chromosome I  | 82.5     | 1464063 | 1464199 |
| VC0500a | TransposaseOrfAB,subunit a            | 1      | Chromosome I  | 82.5     | 1820854 | 1820718 |
| VC0500a | TransposaseOrfAB,subunit a            | 1      | Chromosome I  | 82.5     | 2629990 | 2630126 |
| VC0500a | TransposaseOrfAB,subunit a            | 2      | Chromosome II | 82.5     | 3014    | 2878    |
| VC0500a | TransposaseOrfAB,subunit a            | 2      | Chromosome II | 82.5     | 357076  | 356940  |
| VC0500a | TransposaseOrfAB,subunit a            | 2      | Chromosome II | 82.5     | 55931   | 56067   |
| VC0501b | Transposase                           | 1      | Chromosome I  | 71.3     | 2211656 | 2212115 |
| VC0513  | AraC family transcriptional regulator | 1      | Chromosome I  | 99.9     | 2628886 | 2628071 |
| VC0514  | Methyl-accepting chemotaxis protein   | 1      | Chromosome I  | 100      | 2628074 | 2626194 |
| VC0515  | Putative signal transduction protein  | 1      | Chromosome I  | 100      | 2626090 | 2624858 |
| VC0516  | Phage integrase                       | 1      | Chromosome I  | 100      | 2623227 | 2624468 |
| VC0517  | RNA polymerase sigma factor RpoD      | 1      | Chromosome I  | 100      | 2620964 | 2622841 |
